# Supplementary material for: Cholesterol Levels in Blood and the Risk of Prostate Cancer: A Meta-analysis of 14 Prospective Studies
Source: Oxford University Press journal article supplement (doi:10.1158/1055-9965.epi-14-1329), 2015-05-07
Supplement: 10559965epi141329-sup-141604_1_supp_2907534_nlsqtw.doc [file 10559965epi141329-sup-141604_1_supp_2907534_nlsqtw.doc]

**Supplementary Table S1. MOOSE Checklist**

| **Checklist item** | **Reported on page #** |
| --- | --- |
| Reporting of background should include: |  |
| Problem definition | 4 |
| Hypothesis statement | 4-5 |
| Description of study outcome(s) | 5 |
| Type of exposure or intervention used | 4-5 |
| Type of study designs used | 5 |
| Study population | 5 |
| Reporting of search strategy should include: |  |
| Qualifications of searchers (e.g., librarians and investigators) | 6 |
| Search strategy, including time period included in the synthesis and keywords | 6 |
| Effort to include all available studies, including contact with authors | 6 |
| Databases and registries searched | 6 |
| Search software used, name and version, including special features used (e.g., explosion) | None |
| Use of hand searching (e.g., reference lists of obtained articles) | 6 |
| List of citations located and those excluded, including justification | 10, Supplementary Fig. S1 |
| Method of addressing articles published in languages other than English | None* |
| Method of handling abstracts and unpublished studies | 6 |
| Description of any contact with authors | 6 |
| Reporting of methods should include: |  |
| Description of relevance or appropriateness of studies assembled for assessing the hypothesis to be tested | 8 |
| Rationale for the selection and coding of data (e.g., sound clinical principles or convenience) | 7 |
| Documentation of how data were classified and coded (e.g., multiple raters, blinding, and interrater  reliability) | 7 |
| Assessment of confounding (e.g., comparability of cases and controls in studies where appropriate) | 9 |
| Assessment of study quality, including blinding of quality assessors; stratification or regression on  possible predictors of study results | 7-8 |
| Assessment of heterogeneity | 8-9 |
| Description of statistical methods (e.g., complete description of fixed or random effects models,  justification of whether the chosen models account for predictors of study results, dose-response models, or cumulative meta-analysis) in sufficient detail to be replicated | 7-9 |
| Provision of appropriate tables and graphics | 7-9 |
| Reporting of results should include: |  |
| Graphic summarizing individual study estimates and overall estimate | Figure 1, Figure 2, Figure 3 and Figure 4 |
| Table giving descriptive information for each study included | Table 1 and Supplementary Table S3 |
| Results of sensitivity testing (e.g., subgroup analysis) | Tables 2 and Supplementary Table S5 |
| Indication of statistical uncertainty of findings | 13-14 |
| Reporting of discussion should include: |  |
| Quantitative assessment of bias (e.g., publication bias) | 17-19, Table 2, and Supplementary Fig. S2 |
| Justification of exclusion (e.g., exclusion of non-English-language citations) | 17-19 |
| Assessment of quality of included studies | 17-19 |
| Reporting of conclusions should include: |  |
| Consideration of alternative explanations for observed results | 20 |
| Generalization of the conclusions (i.e., appropriate for the data presented and within the domain of the literature review) | 20 |
| Guidelines for future research | 20 |
| Disclosure of funding source | 2 |

**There was no non-English published articles met the inclusion criteria.*

*From: Stroup DF, Berlin JA, Morton SC, Olkin I, Williamson GD, Rennie D, Moher D, Becker BJ, Sipe TA, Thacker SB. Meta-analysis of observational studies in epidemiology: a proposal for reporting. Meta-analysis Of Observational Studies in Epidemiology (MOOSE) group. JAMA 2000; 283(15):2008-2012.*

**Supplementary Table S2.** Study Quality Scores of Prospective Cohort Studies Using Newcastle- Ottawa Scale

|  | **Selection** | | | | **Comparability** | | **Exposure** | | | **summary** |
| --- | --- | --- | --- | --- | --- | --- | --- | --- | --- | --- |
|  | Representativeness of the Exposed Cohort | Selection of the non exposed cohort | Ascertainment of exposure | Demonstration that outcome of interest was not present at start of study | Study controls for age | Study controls for BMI and statin use | Assessment of outcome | Was follow-up long enough for outcomes to occur | Was follow-up long enough for outcomes to occur |
| His 2014 |  |  |  |  |  |  |  |  |  | 8 |
| Häggström 2012 |  |  |  |  |  |  |  |  |  | 8 |
| Jacobs 2012 |  |  |  |  |  |  |  |  |  | 8 |
| Shafique 2012 |  |  |  |  |  |  |  |  |  | 8 |
| Farwell 2011 |  |  |  |  |  |  |  |  |  | 8 |
| Grundmark 2011 |  |  |  |  |  |  |  |  |  | 7 |
| Mondul 2011 |  |  |  |  |  |  |  |  |  | 8 |
| Van Hemelrijck 2011 |  |  |  |  |  |  |  |  |  | 7 |
| Kitahara 2011 |  |  |  |  |  |  |  |  |  | 8 |
| Mondul 2010 |  |  |  |  |  |  |  |  |  | 8 |
| Iso 2009 |  |  |  |  |  |  |  |  |  | 8 |
| Platz 2009 |  |  |  |  |  |  |  |  |  | 8 |
| Martin 2009 |  |  |  |  |  |  |  |  |  | 8 |
| Steenland 1995 |  |  |  |  |  |  |  |  |  | 8 |
| *From: Stang A. Critical evaluation of the Newcastle-Ottawa scale for the assessment of the quality of nonrandomized studies in meta-analyses. European journal of epidemiology. 2010;25:603-5.* | | | | | | | | | | |

| **Study** | **Country /period** | **Adjustment for Confounders** |
| --- | --- | --- |
| His M 2014 | France/1994-2007 | Age (time-scale in the Cox models), intervention group, number of dietary records, alcohol intake per day, physical activity, smoking status, educational level, height, BMI, family history of prostate cancer, baseline PSA level, energy intake per day and glycaemia, use of blood-glucose-lowering drugs, lipid-lowering drugs, triglycerides-lowering drugs and antihypertensive drugs |
| Häggström 2012 | Norway, Sweden, and Austria/1972-2005 | Smoking and quintiles of BMI and stratified for sub-cohort, 5 birth cohorts, and 5 categories of age at measurement |
| Jacobs 2012 | USA/1998-2007 | Age, race, blood draw date, physical activity, use of cholesterol-lowering drugs, and history of heart attack |
| Shafique 2012 | Scotland, UK/1970-2007 | Age, BMI, smoking, social class |
| Farwell 2011 | USA/1997-2007 | Statin use, finasteride use history , age, serum total cholesterol, race, smoking history, aspirin use, heart disease, diabetes mellitus , and history of prostate-specific antigen test |
| Grundmark 2011 | Swenden/1970-2003 | NA |
| Mondul 2011 | Finland/1985-2006 | Age (continuous), serum a-tocopherol, family history of prostate cancer, education |
| Van Hemelrijck 2011 | Swendish/1985- | Fasting status, glucose (continuous) and/or triglycerides (continuous) and/or total cholesterol (continuous), SES, and time between measurement taken and cohort entry |
| Kitahara 2011 | Korea/1992-2006 | Age cigarette smoking, alcohol drinking, body mass index, fasting serum glucose, hypertension, and physical activity. |
| Mondul 2010 | USA/1989-2007 | Age (continuous), race, BMI, education level, smoking status, intake of meat, dairy, tomato products, and alcohol, family history of prostate cancer, PSA screening, and use of diabetes medications |
| Iso 2009 | Japan/1990-2004 | Age, height, smoking, marital status, education, physical activity , International Prostate Symptom Score; and blood pressure measures, the use of blood pressure medication |
| Platz 2009 | USA/1993-2003 | Age, race, family history of prostate cancer, BMI, diabetes, regular aspirin use, and history of heart attack. |
| Martin 2009 | Noway/1995-2005 | Age, body mass index, pack year of smoking, ethanol intake, hypertension, diabetes, hyperlipidemia medication use, total vegetable intake, coffee intake and public health center. |
| Steenland 1995 | USA1971-1987 | Age, BMI, alcohol, income, and recreational physical activity |

**Supplementary Table S3.** Additional Information of Included Studies

**Supplementary Table S4.** The Dose-Response analysis of TC, HDL, and LDL

|  | **Linearity** | | | | | | | |  | **Non-linearity** |
| --- | --- | --- | --- | --- | --- | --- | --- | --- | --- | --- |
| **No. of studies** | **Fixed-effect dose-response model** | |  | **Random-effect dose-response model** | | **Heterogeneity** | |  | ***P* value** |
| **RR (95% CI)** | ***P* value** |  | **RR (95% CI)** | ***P* value** | ***P* value** | ***Q*** |  |
| TC | 12 | 1.006 (0.999-1.002) | 0.086 |  | 1.006 (0.993-1.019) | 0.384 | 0.001 | 31.25 |  | 0.194 |
| HDL | 6 | **0.952 (0.914-0.992)** | **0.018** |  | 0.985 (0.908-1.069) | 0.716 | 0.017 | 13.85 |  | 0.057 |
| LDL | 4 | 1.014 (0.994-1.035) | 0.169 |  | 1.036 (0.977-1.099) | 0.236 | 0.033 | 8.72 |  | 0.492 |
| *Abbreviations: RR, Risk Ratio*  *From: Orsini N, Li R, Wolk A, Khudyakov P, Spiegelman D. Meta-analysis for linear and nonlinear dose-response relations: examples, an evaluation of approximations, and software. American journal of epidemiology. 2012;175:66-73.* | | | | | | | | | | |

**Supplementary Table S5.** Sensitivity analysis

|  | **Fix-effect model** |  | **Omitting one study (Random-effect model)** | | |
| --- | --- | --- | --- | --- | --- |
|  | **RR (95% CI)** |  | **Exclude study *a*** | **Weight (%)** | **RR (95% CI)** |
| TC and PCa risk | 1.04(0.99-1.10) |  | Van Hemelrijck 2011 | 16.86 | 1.06(0.97-1.16) |
| High grade | **1.31(1.07-1.62)** |  | Platz 2009 | 19.35 | 1.29(0.82-2.03) |
| Study population |  |  |  |  |  |
| European | 1.00(0.95-1.07) |  | Van Hemelrijck 2011 | 40.23 | 1.01(0.92-1.12) |
| American | 1.07(0.94-1.22) |  | Platz 2009 | 31.83 | 1.05(0.79-1.40) |
| Asian | **1.25(1.05-1.49)** |  | NA | NA | NA |
| Study design |  |  |  |  |  |
| Cohort study | 1.03(0.97-1.09) |  | Van Hemelrijck 2011 | 20.17 | 1.07(0.94-1.20) |
| Others | 1.09(0.97-1.22) |  | Mondul 2011 | 61.24 | 1.03(0.97-1.09) |
| Follow-up time (years) |  |  |  |  |  |
| < 10 | 1.02(0.95-1.10) |  | Van Hemelrijck 2011 | 38.25 | 1.11(0.91-1.35) |
| ≥10 | 1.06(0.99-1.14) |  | Haggstrom 2012 | 20.90 | 1.07(0.95-1.20) |
| Adjustment for BMI |  |  |  |  |  |
| Yes | 1.05(0.98-1.14) |  | Haggstrom 2012 | 27.10 | 1.10(0.99-1.22) |
| No | 1.03(0.97-1.10) |  | Van Hemelrijck 2011 | 29.45 | 1.06(0.87-1.29) |
| No. of PCas |  |  |  |  |  |
| < 1000 | 1.01(0.90-1.13) |  | Martin 2009 | 18.09 | 0.98(0.82-1.17) |
| ≥ 1000 | 1.05(0.99-1.11) |  | Van Hemelrijck 2011 | 26.09 | 1.11(0.99-1.24) |
| HDL and PCa risk | **0.90(0.83-0.98)** |  | Mondul 2011 | 25.30 | 0.95(0.76-1.20) |
| High grade | 0.95(0.83-1.09) |  | Mondul 2011 | 39.08 | 1.46(0.48-4.77) |
| LDL and PCa risk | 1.08(0.97-1.21) |  | Van Hemelrijck 2011 | 39.55 | 1.26(0.84-1.89) |
| High grade | 1.28(0.82-1.99) |  | NA | NA | NA |
| *Abbreviations: RR, Risk Ratio; TC, total cholesterol; HDL, high-density lipoprotein cholesterol; LDL, low-density lipoprotein cholesterol; PCa, prostate cancer; NA, not available.*  ***a*** *The most relatively weighted study from each subgroup analysis was excluded.* | | | | | |


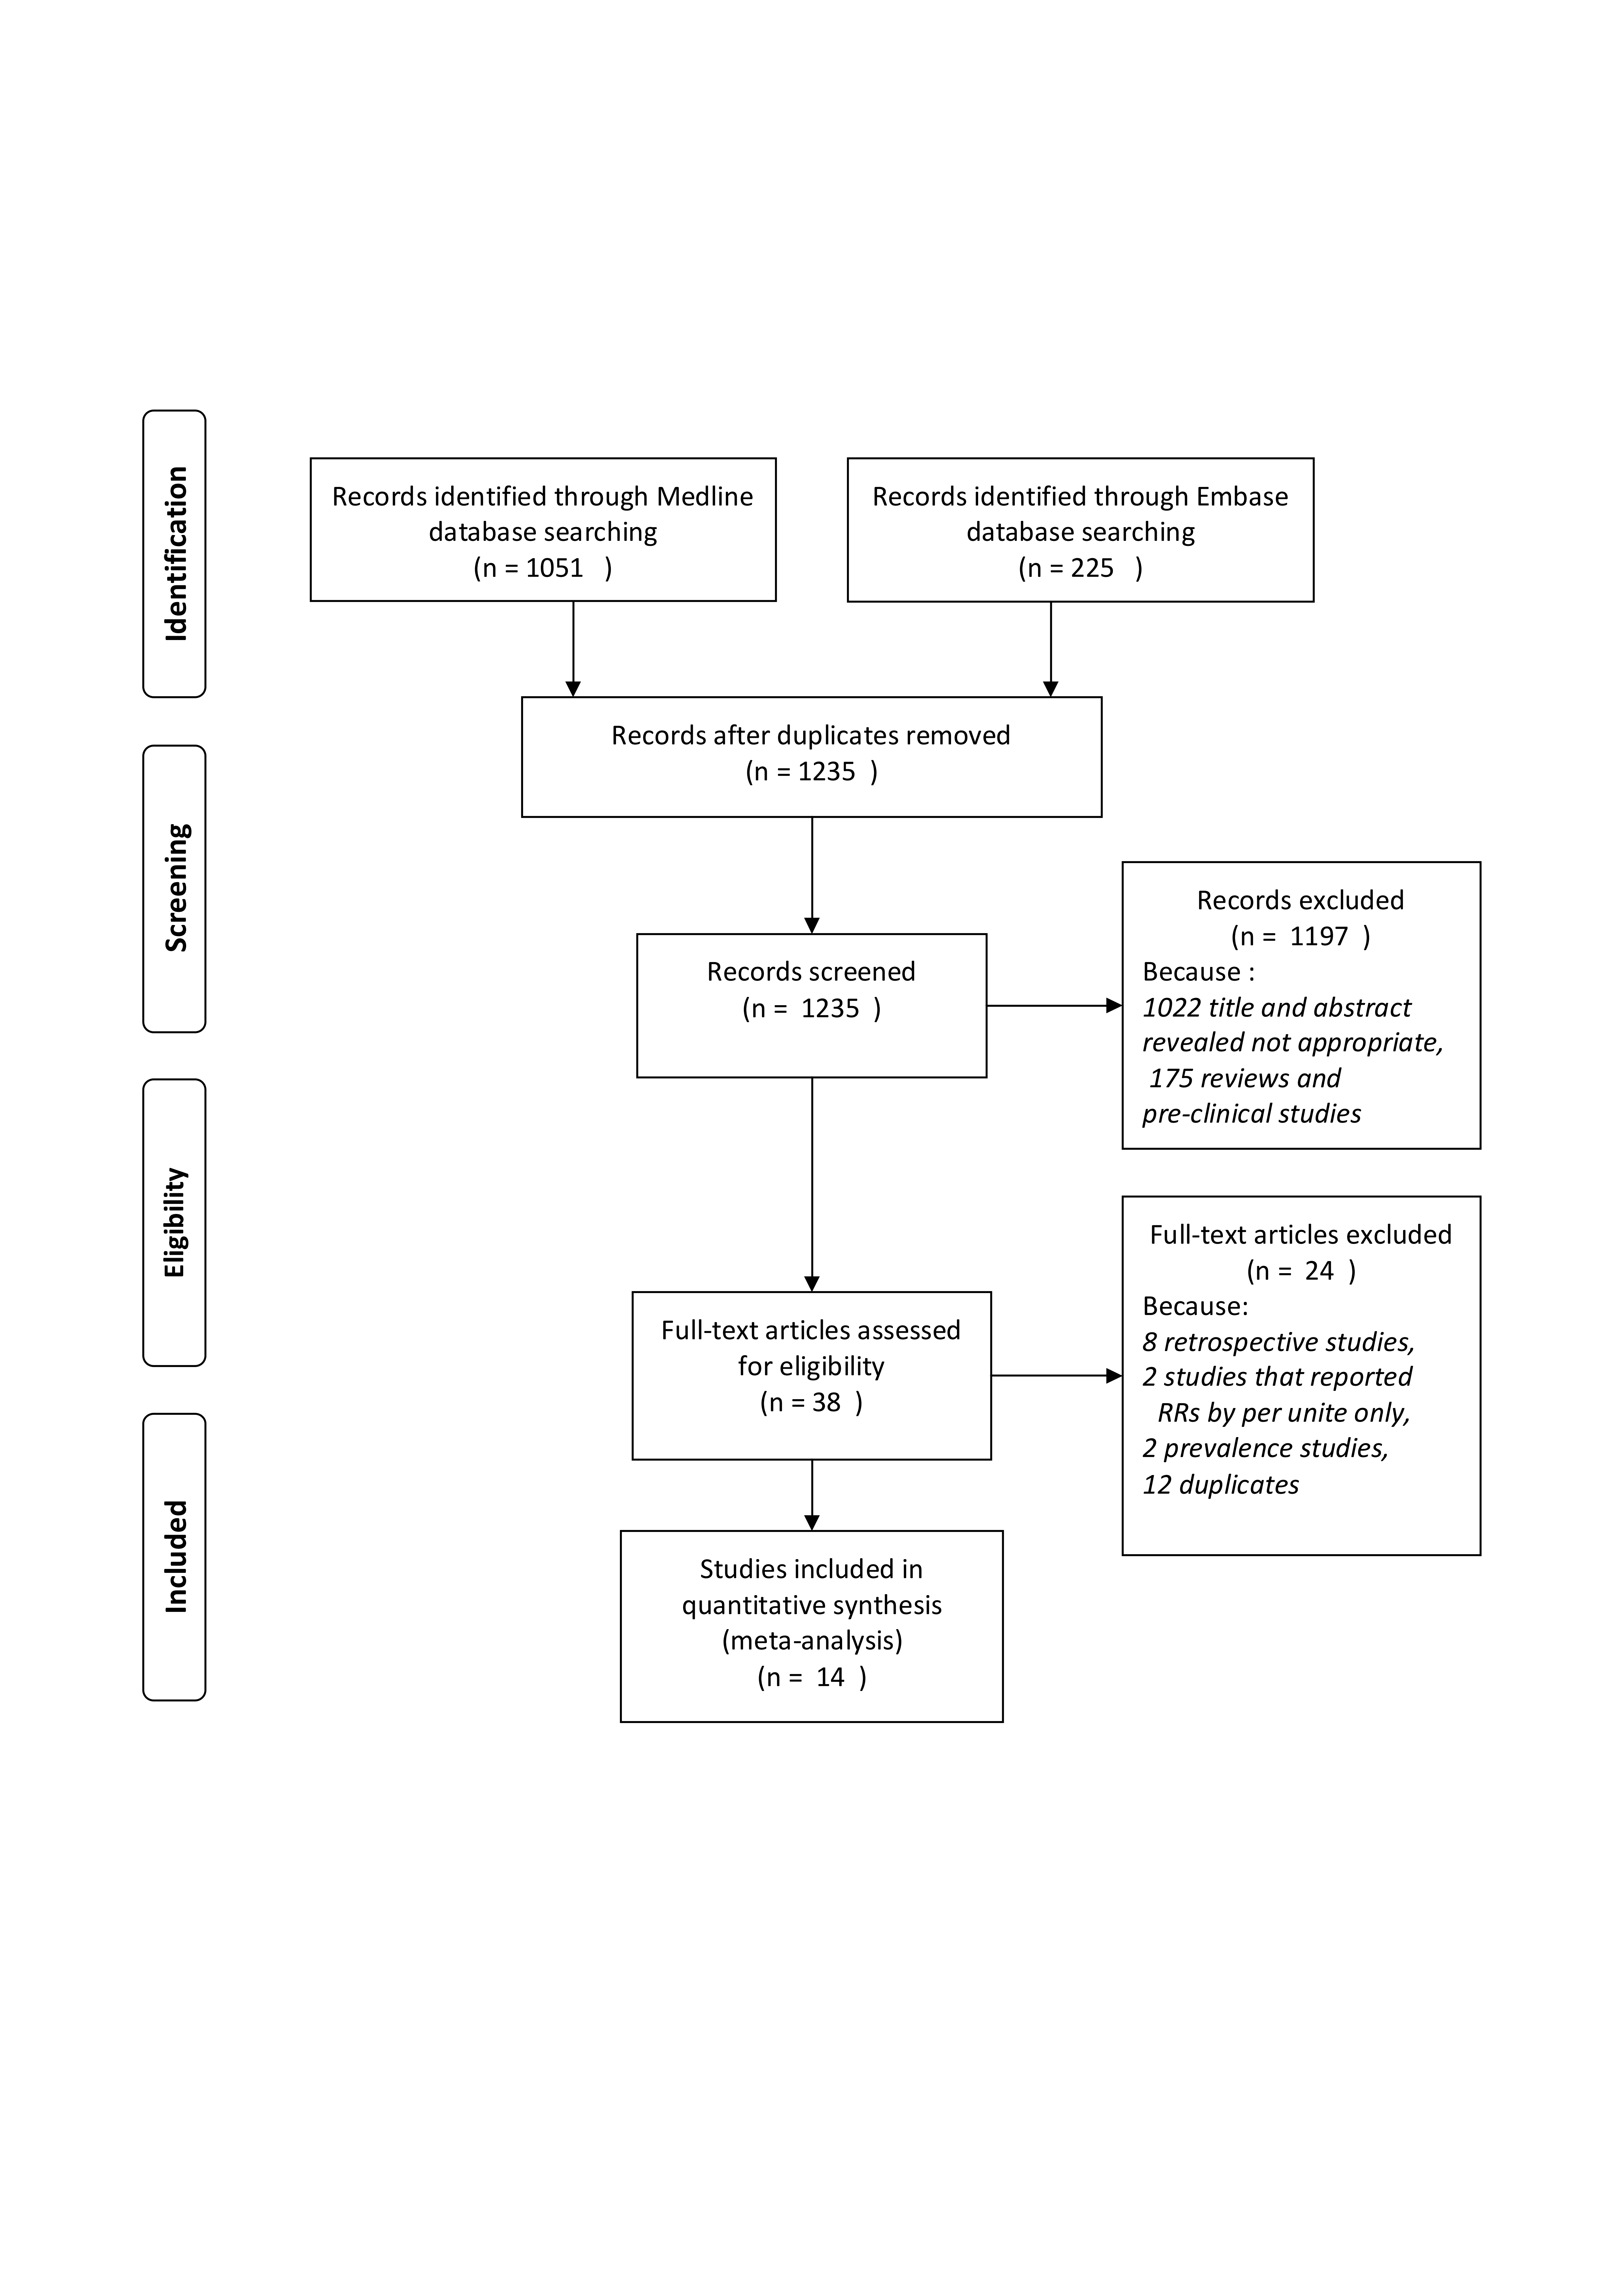


**Supplementary Fig. S1.** Selection of Studies for Inclusion in Meta-analysis


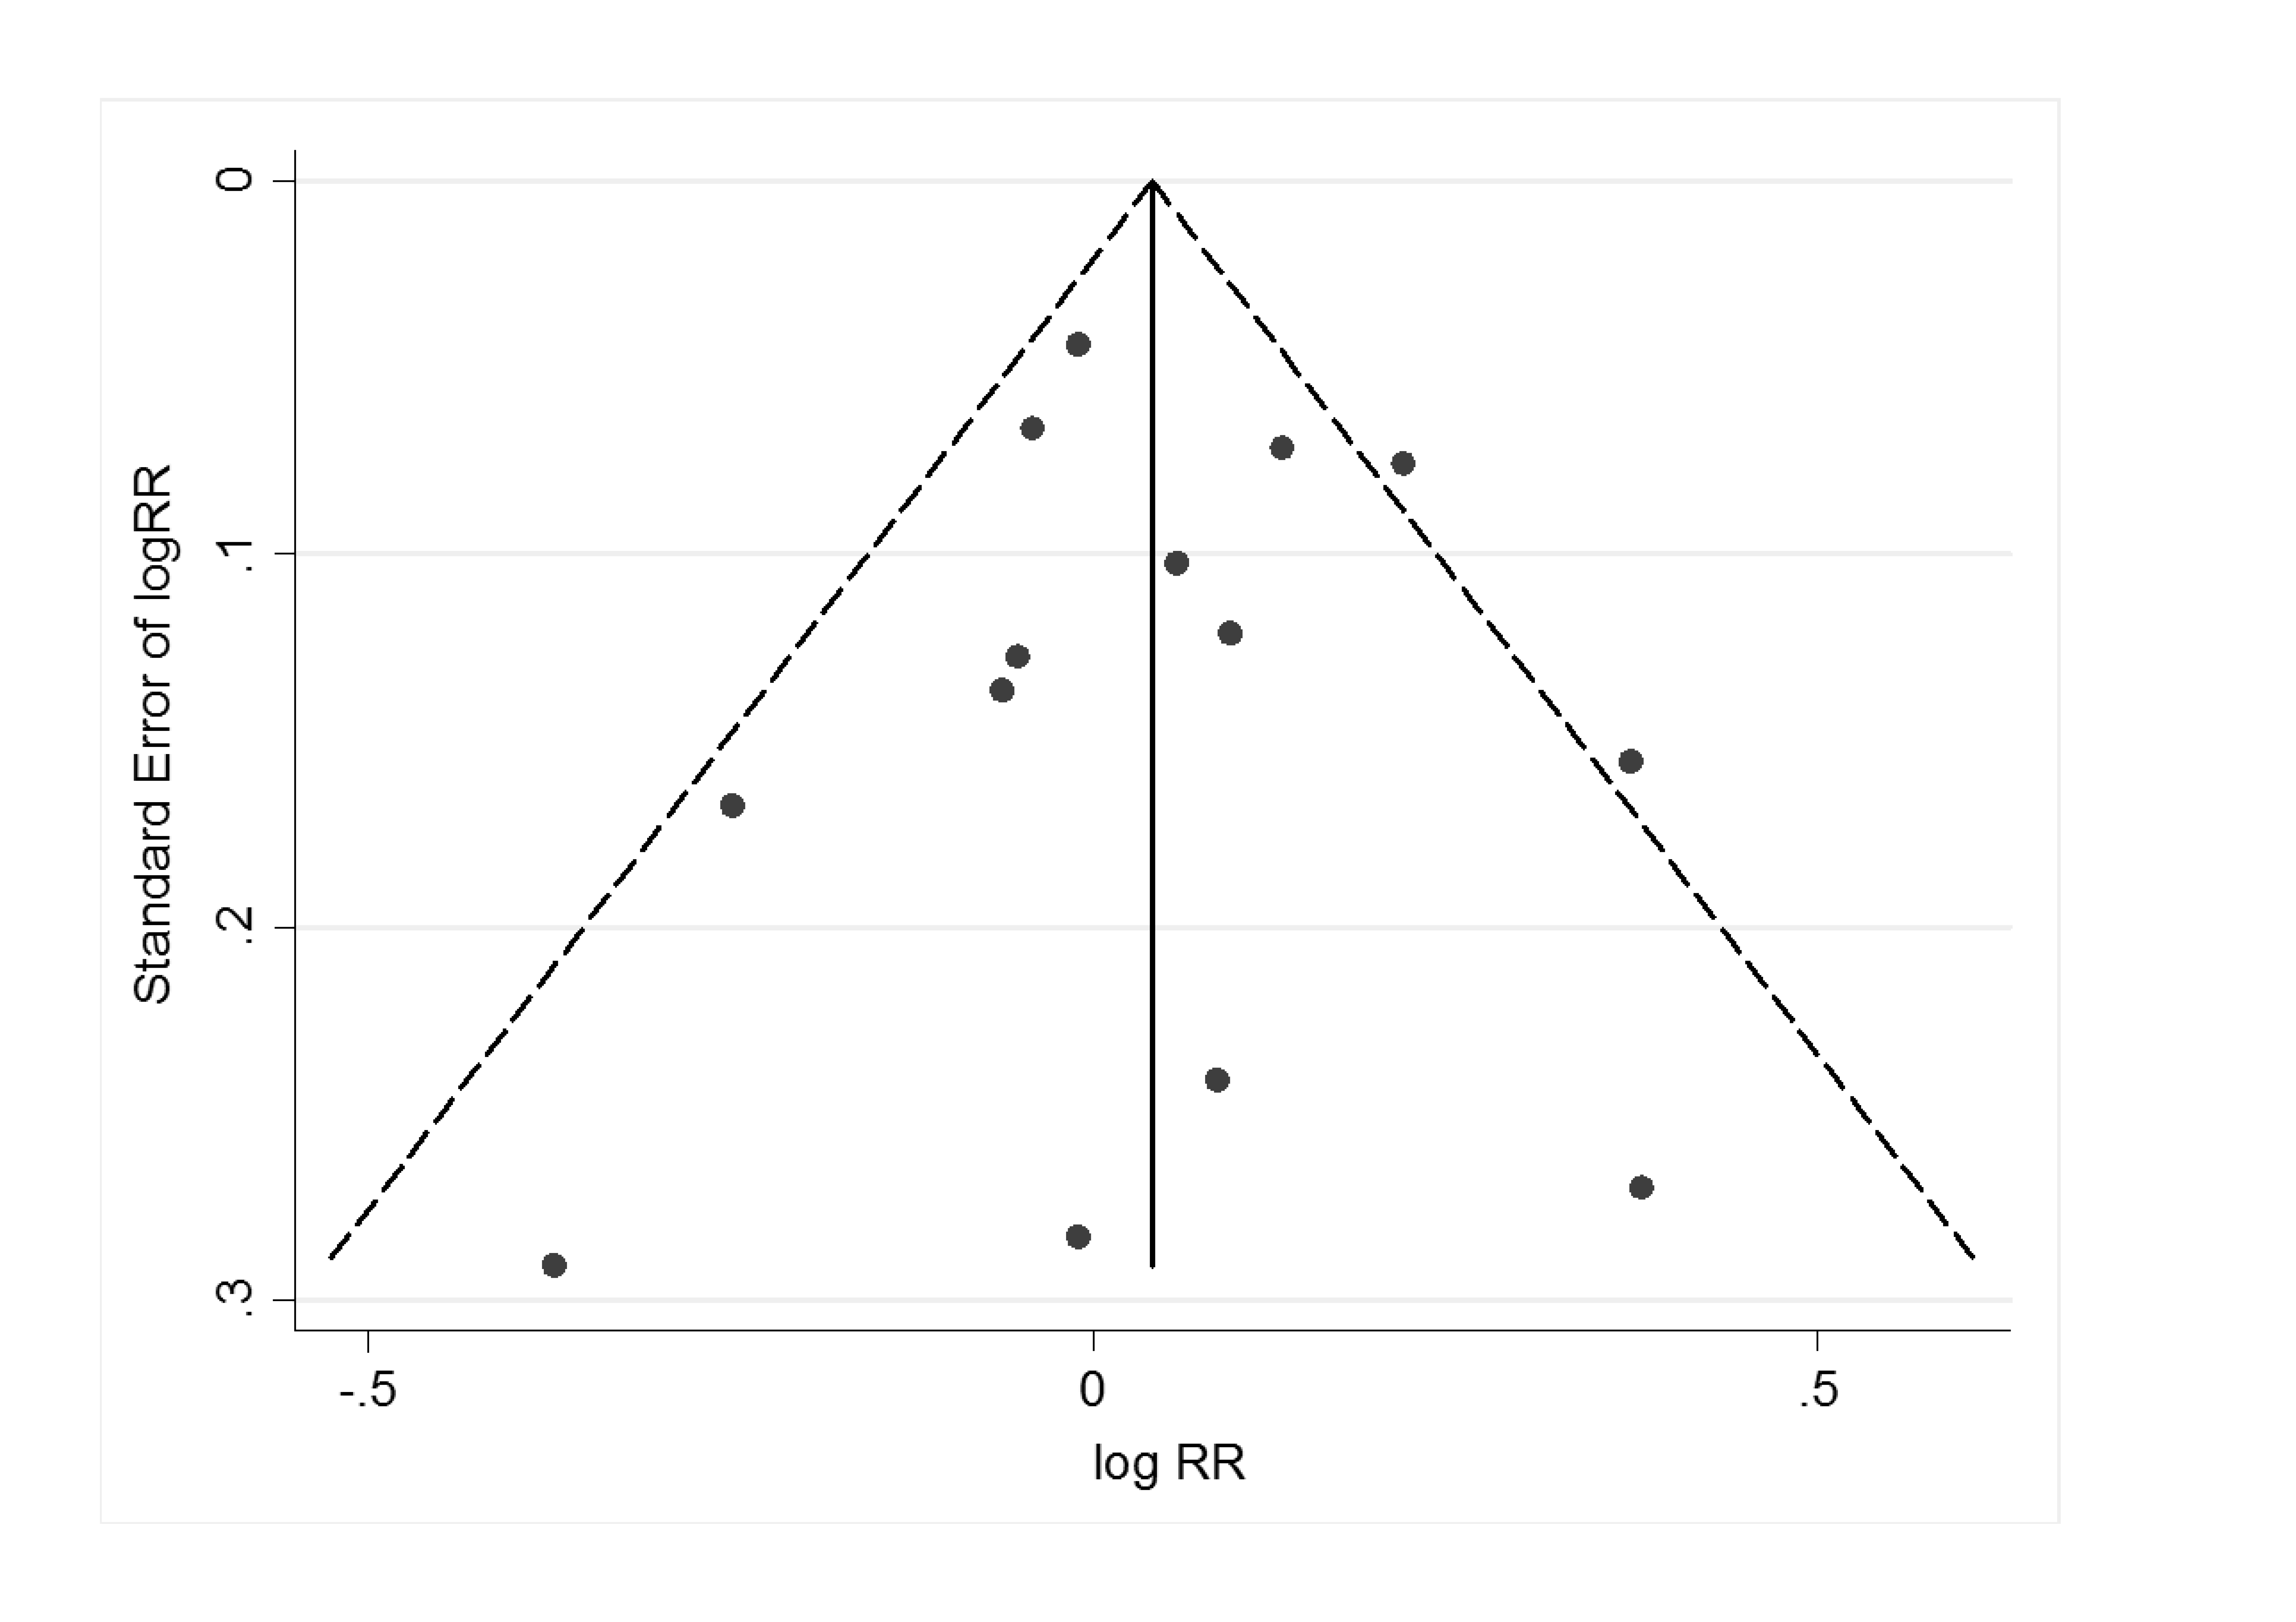


**Supplementary Fig. S2.** Funnel Plots of Publication Bias for Total Cholesterol

*Abbreviations: RR, Risk Ratio. Navy circles represent individual studies.*
